# Supplementary material
Source: publisher figshare collection journal article supplement (https://acs.figshare.com/ndownloader/files/5178847)

## Salt-Assisted Deposition of $\text{SnO}_2$ on $\alpha\text{-MoO}_3$ Nanorods and Fabrication of Polycrystalline $\text{SnO}_2$ Nanotubes

Bin Liu and Hua Chun Zeng\*

### 1. TEM results on tilting examination

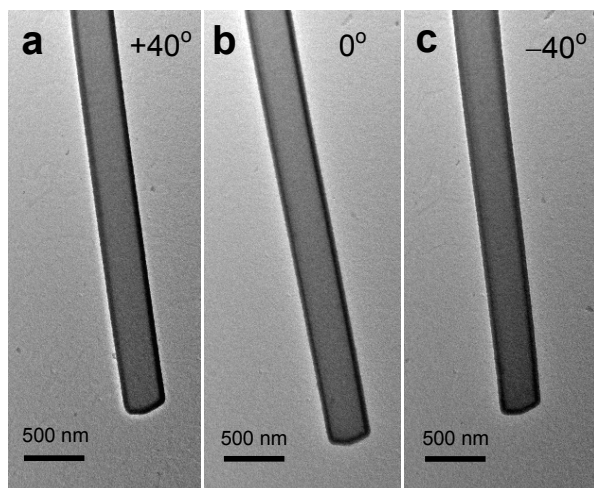

A close-ended  $\text{SnO}_2$  nanotube (same as that in Figure 3 of the main text)

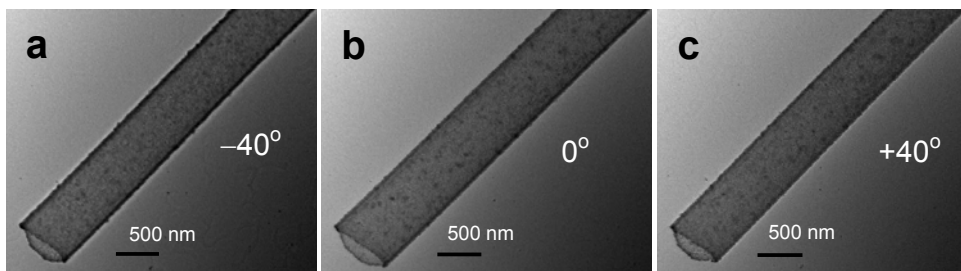

An open-ended  $\text{SnO}_2$  nanotube (same as that in Figure 4 of the main text)

## 2. High resolution TEM results on wall structure

The following HRTEM image indicates a more detailed view on the  $\text{SnO}_2$  lattice fringes and the presence of inter-particle spaces (lighter parts).

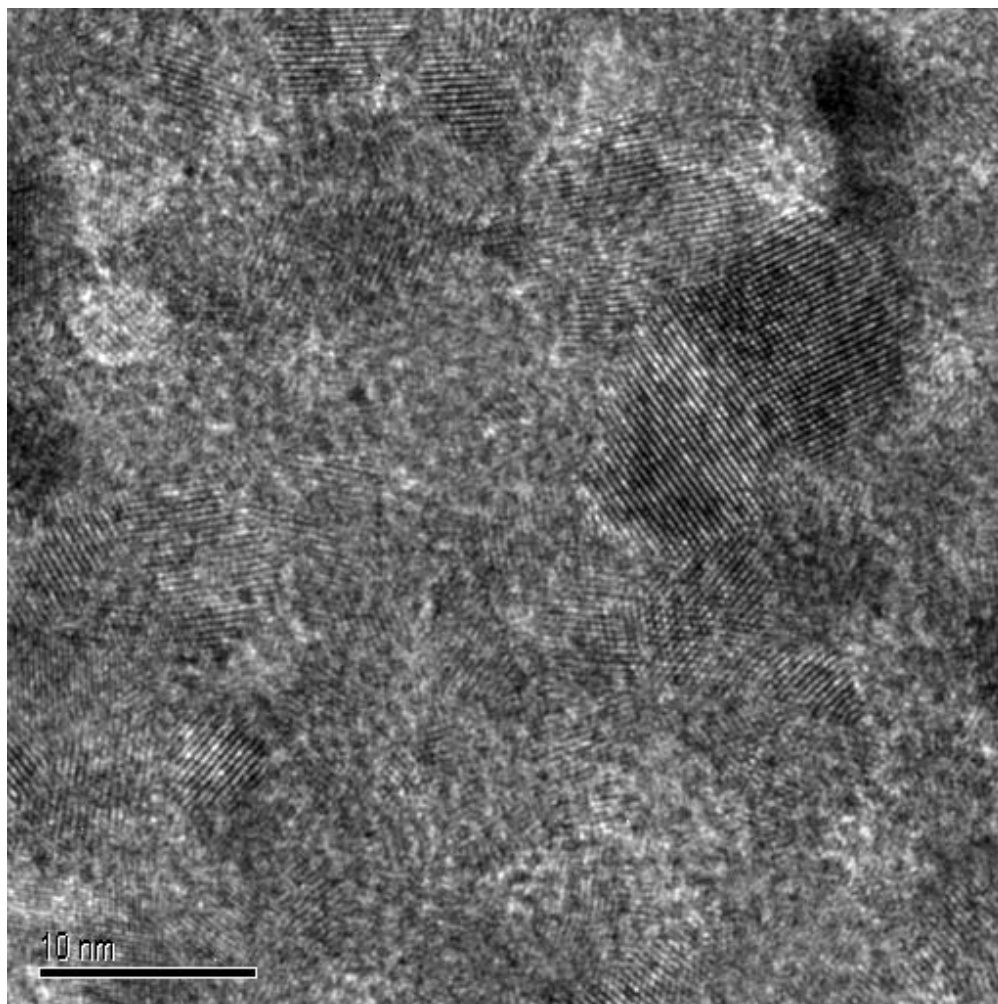

The following two HRTEM images indicate the random orientations of the SnO<sub>2</sub> nanocrystallites, including those on the edge areas (the framed darker part).

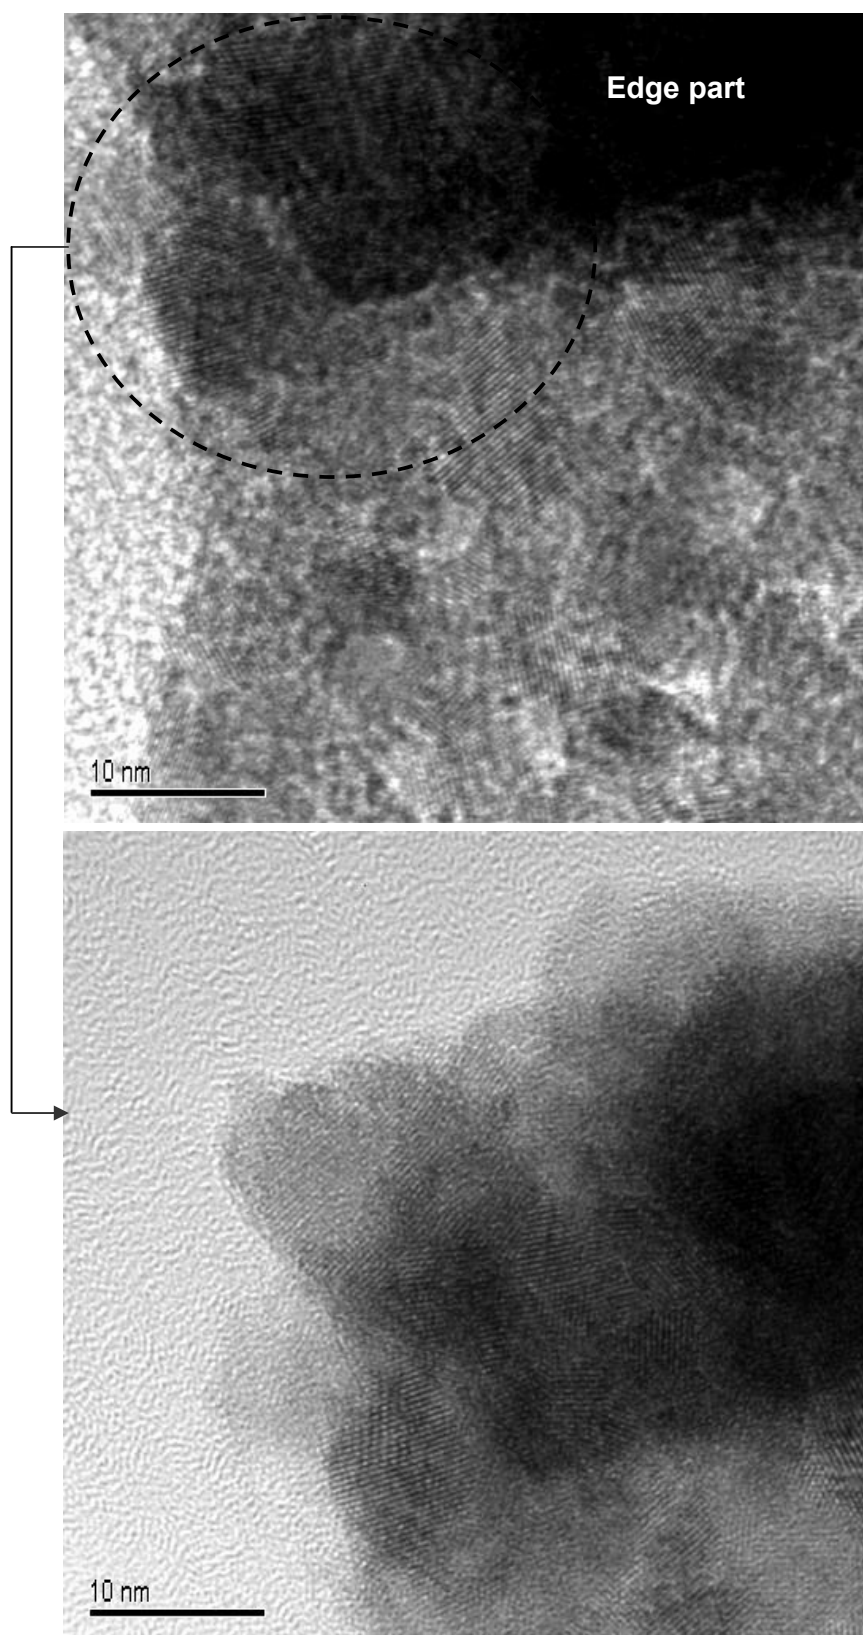

### 3. Energy dispersive X-ray analysis on large-scale SnO<sub>2</sub> nanotube products

The following SEM image was measured for a sample of the SnO<sub>2</sub> nanotubes, together with their dissolving  $\alpha$ -MoO<sub>3</sub> nanorod templates. A sample EDX spectrum from the framed area and its analytical results are also displayed. Note that the remaining  $\alpha$ -MoO<sub>3</sub> nanorod templates can be removed completely either with a prolonged reaction time or with dilute NaOH solutions (see the main text).

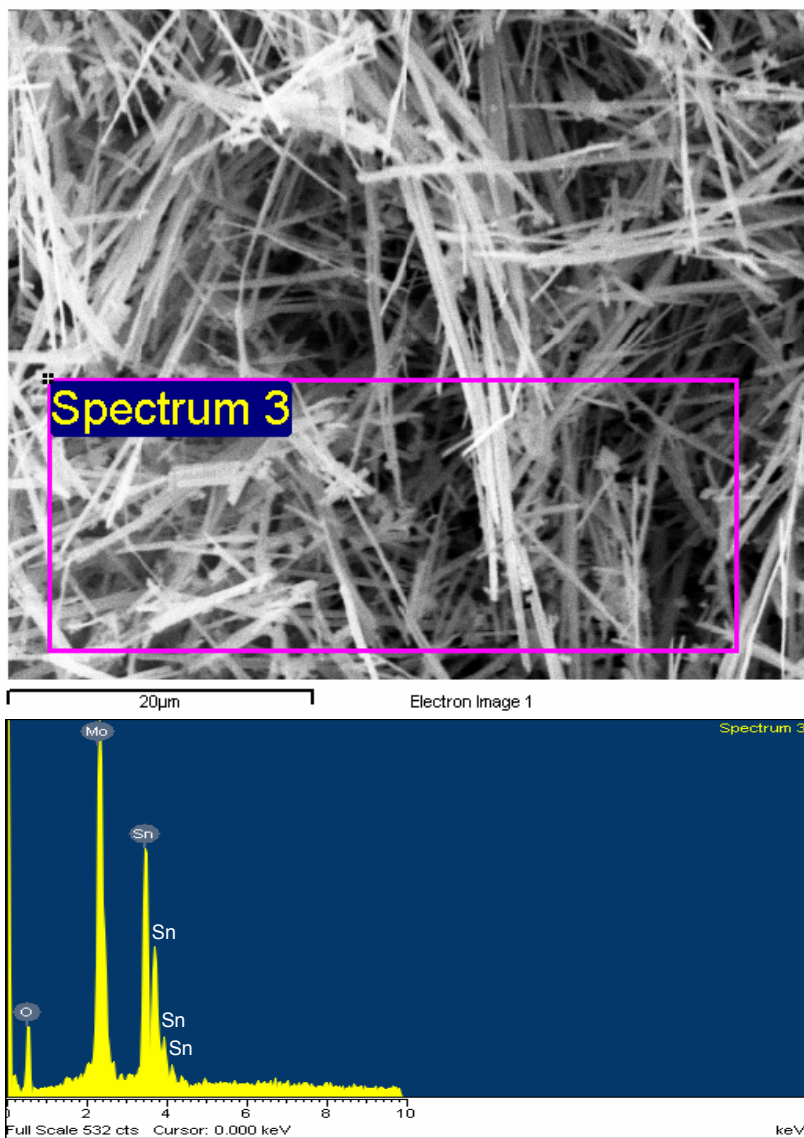

| Element | App<br>Conc. | Intensity<br>Corrn. | Weight% | Weight%<br>Sigma | Atomic% |
|---------|--------------|---------------------|---------|------------------|---------|
| Mo L    | 22.08        | 0.8549              | 31.56   | 0.79             | 14.16   |
| O K     | 7.54         | 0.3514              | 26.21   | 0.83             | 70.52   |
| Sn L    | 26.71        | 0.7727              | 42.23   | 0.86             | 15.32   |
| Totals  |              |                     | 100.00  |                  | 100.00  |

#### 4. XRD patterns of dissolving $\alpha$ -MoO<sub>3</sub> and H<sub>x</sub>MoO<sub>3</sub>

The following XRD patterns were measured for a sample of the SnO<sub>2</sub> nanotubes, together with their dissolving  $\alpha$ -MoO<sub>3</sub> nanorod templates. It should be mentioned that under high-temperature conditions, the conversion of  $\alpha$ -MoO<sub>3</sub> to H<sub>x</sub>MoO<sub>3</sub> is not observable, due to the protection of thick SnO<sub>2</sub> layer (pattern a). However, at lower temperatures, the conversion is faster (pattern b) because of a thinner layer of SnO<sub>2</sub>. In addition to  $\alpha$ -MoO<sub>3</sub> phase (patterns b, with the reference to pattern c), H<sub>x</sub>MoO<sub>3</sub> phase is present due to redox reactions between SnCl<sub>2</sub> and solid  $\alpha$ -MoO<sub>3</sub>. Note that H<sub>x</sub>MoO<sub>3</sub> has a very similar structure as that of  $\alpha$ -MoO<sub>3</sub> with an expansion along *b*-axis.<sup>48</sup>

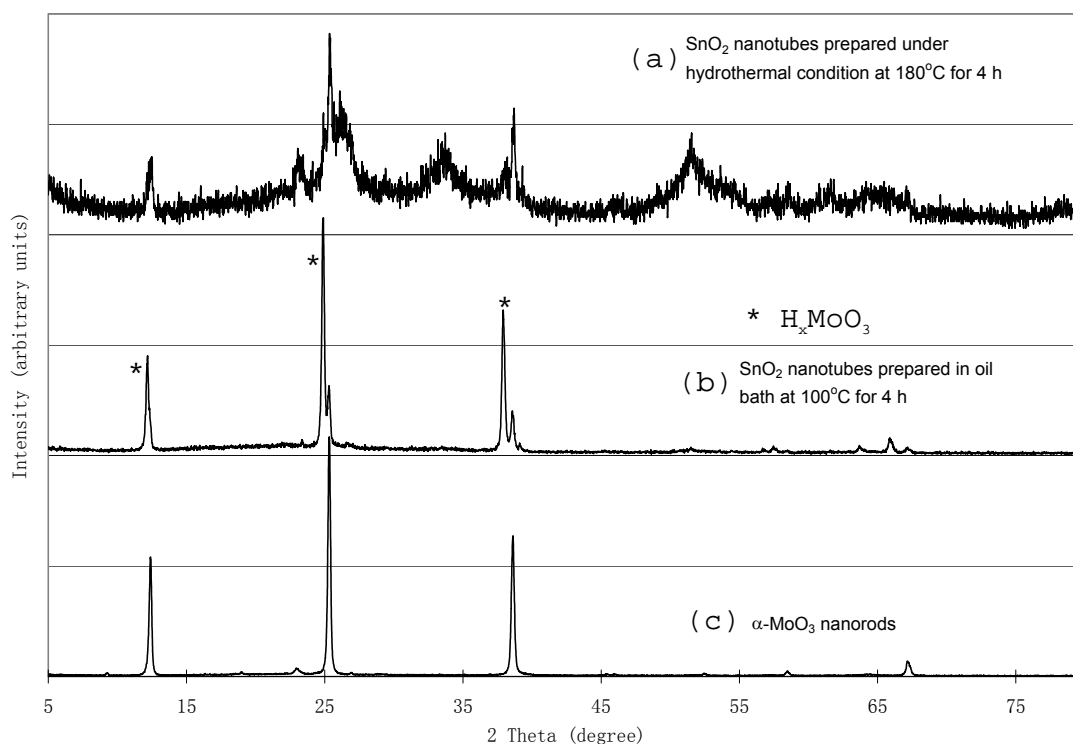

Supplement: Supplementary file 1 [file 5178847]
